# Supplementary material for: Asthma and Other Respiratory Diseases of Children in Relation to Personal Behavior, Household, Parental and Environmental Factors in West China
Source: Toxics. 2023 Nov 28;11(12):964. doi: 10.3390/toxics11120964 (PMC10747494; doi:10.3390/toxics11120964)
Supplement: Supplementary file 1 [file toxics-11-00964-s001.zip › toxics-2691324-supplementary.pdf]

# Supplementary Materials: Asthma and Other Respiratory Diseases of Children in Relation to Personal Behavior, Household, Parental and Environmental Factors in West China

Changan Cao <sup>1</sup>, Yuna Wang <sup>2</sup>, Li Peng <sup>3</sup>, Weiqi Wu <sup>4</sup>, Huimin Yang <sup>2</sup> and Zhigang Li <sup>5,\*</sup>

<sup>1</sup> School of Medicine, Xiamen University, Xiamen 361104, China; changan\_cao@163.com

<sup>2</sup> School of Chemical and Environmental Sciences, YiLi Normal University, Yining 835000, China; yunawang99@163.com (Y.W.); yhm19991117@163.com (H.Y.)

<sup>3</sup> School of Energy and Environmental Engineering, University of Science of Technology Beijing, Beijing 10083, China; 42026184@xs.ustb.edu.cn

<sup>4</sup> Department of Geography, University College London, London WC1E 6BT, UK; zczqwwu@ucl.ac.uk

<sup>5</sup> Chinese Research Academy of Environmental Sciences, Beijing 100012, China

\* Correspondence: lizg@craes.org.cn

**Table S1.** Prevalence of childhood pneumonia with different potential influence factors.

| Index                          |            | Household coal use |            |   | Household mold |            |   |
|--------------------------------|------------|--------------------|------------|---|----------------|------------|---|
|                                |            | urban              | rural      | P | urban          | rural      | P |
| <b>Doctor-diagnosed Asthma</b> | <b>Yes</b> | 2 (5.9%)           | 8 (18.6%)  | * | 6 (6.9%)       | 9 (9.9%)   |   |
| Doctor-diagnosed bronchitis    | Yes        | 8 (23.5%)          | 10 (23.3%) |   | 22 (25.3%)     | 21 (23.1%) |   |
| Doctor-diagnosed pneumonia     | Yes        | 5 (14.7%)          | 5 (11.6%)  | * | 11 (12.6%)     | 6 (6.6%)   | * |
| Current bronchitis             | Yes        | 6 (17.6%)          | 7 (16.3%)  |   | 21 (24.1%)     | 14 (15.4%) | * |

\* indicates statistically significant difference with a *P* value <0.05.

**Table S2.** The stratification of respiratory diseases prevalence by various factors.

|                             | Breastfeeding | Mother without asthma history     | Mother ever got asthma     | P     |
|-----------------------------|---------------|-----------------------------------|----------------------------|-------|
|                             |               |                                   |                            |       |
| Doctor-diagnosed Asthma     | No            | 4 (11.4%)                         | 1 (100%)                   | 0.000 |
|                             | Yes           | 16 (3.1%)                         | 6 (60%)                    |       |
|                             | Breastfeeding | Mother without bronchitis history | Mother ever got bronchitis |       |
|                             |               |                                   |                            |       |
| Doctor-diagnosed Asthma     | No            | 4 (12.9%)                         | 1 (20%)                    | 0.023 |
|                             | Yes           | 18 (3.7%)                         | 4 (9.5%)                   |       |
| Doctor-diagnosed bronchitis | No            | 3 (9.7%)                          | 1 (20%)                    | 0.275 |
|                             | Yes           | 76 (15.6%)                        | 26 (61.9%)                 |       |
| Doctor-diagnosed pneumonia  | No            | 3 (9.7%)                          | 0 (0)                      | 1.000 |
|                             | Yes           | 32 (6.6%)                         | 11 (26.2%)                 |       |
| Current bronchitis          | No            | 2 (6.5%)                          | 2 (25%)                    | 0.805 |
|                             | Yes           | 57 (11.7%)                        | 19 (45.2%)                 |       |
